# Supplementary material
Source: Royal Society of Chemistry journal article supplement (doi:10.1039/d5gc06935a)
Supplement: d5gc06935a1.pdf [file d5gc06935a1.pdf]

## *Supporting Information*

### **Defect-Engineered Cu<sub>2</sub>O/Co<sub>x</sub>O Heterostructures with Built-In Electric Fields for High-Current-Density Alkaline Water Splitting**

Tingting Tang,<sup>a</sup> Zhendong Gao,<sup>a</sup> Kuoteng Sun,<sup>c</sup> Chenggong Niu,<sup>a</sup> Chenxi Shang,<sup>a</sup> Jingya Guo,<sup>a</sup>  
Jianniao Tian,<sup>\*a</sup> Tayirjan Taylor Isimjan<sup>\*b</sup> and Xiulin Yang<sup>\*a</sup>

<sup>a</sup> *Guangxi Key Laboratory of Low Carbon Energy Materials, School of Chemistry and Pharmaceutical Sciences, Guangxi Normal University, Guilin 541004, China*

<sup>b</sup> *Saudi Arabia Basic Industries Corporation (SABIC) at King Abdullah University of Science and Technology (KAUST), Thuwal 23955-6900, Saudi Arabia*

<sup>c</sup> *Liuzhou Bureau of EHV Transmission Company of China Southern Power Grid Co. Ltd, Liuzhou 545006, China*

*E-mail addresses: xlyang@gxnu.edu.cn (X. Yang), isimjant@sabic.com  
birdtjn@sina.com (J. Tian).*

## **1. Experimental section**

### **1.1 Materials characterizations**

XRD measurements were performed using a Rigaku D/Max 2500 V/PC diffractometer with Cu K $\alpha$  radiation ( $\lambda = 0.15406$  nm) to determine the crystal structure of the catalysts. The morphological features and elemental information were obtained by field-emission scanning electron microscopy (FESEM, Quanta 200). Further structural details at the nanoscale were provided by transmission electron microscopy (TEM, Talos 200S). XPS analysis was performed on a Thermo Fisher Scientific Nexsa instrument (Mg K $\alpha$  radiation) to probe the chemical states. Raman spectroscopy was conducted using a Renishaw in Via system equipped with a 785 nm laser. A Bruker E500 spectrometer was employed to record the electron paramagnetic resonance (EPR) spectra. The specific surface area and pore structure distribution were measured by a Quantachrome instrument (BET, BELSORP MaxII). Surface wettability, evaluated via water contact angle measurements, was determined using a DataPhysics OCA 15EC goniometer. Optical absorption properties were analyzed with a Shimadzu UV-3600i Plus UV-Vis spectrophotometer to derive the band gap. Additionally, the electronic valence band structure was probed by ultraviolet photoelectron spectroscopy (UPS) on a PHI5000 VersaProbe III spectrometer.

### **1.2 In situ spectroscopic characterizations**

Electrochemical impedance spectroscopy (EIS) was conducted at constant applied potentials (0.95 - 1.45 V vs. RHE) with a 10-minute stabilization period at each potential. This approach enabled simultaneous monitoring of reaction dynamics and surface characteristics, with spectra recorded over a frequency range of 0.01 Hz to 300 kHz.

*In situ* Raman spectroscopy was carried out on a Renishaw InVia Qontor system to track the catalyst's evolution under applied potentials from 1.0 to 1.7 V (vs. RHE). The experiment utilized a Gaoss Union C031-1 electrochemical cell with a standard three-electrode setup (as-synthesized catalyst working electrode, carbon rod counter electrode, Ag/AgCl reference electrode) in 1.0 M KOH. All spectra were recorded with a 785 nm laser and a 10 s integration time.

The in-situ ATR-FTIR setup consisted of a Nicolet 6700 spectrometer (Thermo Fisher Scientific) equipped with an extended-range diamond ATR accessory. A catalyst-modified glassy carbon working electrode, an Ag/AgCl reference electrode, and a Pt wire counter electrode comprised the three-electrode configuration. Spectral data were gathered at 20 s intervals under potentiostatic control using chronoamperometry, with the applied potential swept from 0.95 to 1.45 V (vs. RHE).

The optical band gaps of the samples were determined using a Shimadzu UV-3600i Plus double-beam UV-Vis spectrophotometer. Their work functions were characterized by ultraviolet photoelectron spectroscopy (UPS) on a ThermoFisher Nexsa system. The UPS data analysis involved two key steps:

**Valence Band Maximum (VBM):** The VBM was identified by performing a linear fit to the leading edge of the valence band spectrum and extrapolating it to the baseline energy.

**Work Function ( $\Phi$ ):** The work function was calculated using the formula  $\Phi = h\nu - (E_{cut-off} - E_F)$ , where  $h\nu$  is the incident photon energy (21.22 eV for He I). For example, with a measured secondary electron cut-off edge at 17.28 eV relative to the Fermi level, the work function is  $\Phi = 21.22 \text{ eV} - 17.28 \text{ eV} = 3.94 \text{ eV}$ .

### 1.3 Electrochemical characterizations

The electrochemical properties were characterized using a Biologic VMP3 workstation with a standard three-electrode setup in 1.0 M KOH (pH = 13.5). The system comprised a working electrode (1 cm<sup>2</sup> catalyst-coated nickel foam), a graphite rod counter electrode, and a saturated calomel electrode (SCE). All reported potentials were iR-compensated and referenced to the reversible hydrogen electrode (RHE) scale according to the equation  $E_{RHE} = E_{SCE} + 0.059 \times \text{pH} + 0.241 \text{ V}$ .

All polarization curves were recorded at a scan rate of 5 mV s<sup>-1</sup> and were corrected for solution resistance (iR compensation). The uncompensated ohmic resistance ( $R_s \approx 0.89 \Omega$ ) was determined from the high-frequency intercept of the electrochemical impedance spectra. An 85% iR compensation (corresponding to 0.76  $\Omega$ ) was applied during the measurements using the potentiostat's built-in positive-feedback function.

Catalytic activity was evaluated by linear sweep voltammetry (LSV) from 0 to 1.4 V (vs. SCE) at a scan rate of 0.5 mV/s. The electrochemical active surface area (ECSA) was estimated via cyclic voltammetry (CV) in the non-Faradaic region (0.1–0.2 V vs. SCE) at scan rates ranging from 2 to 12 mV/s. The double-layer capacitance ( $C_{dl}$ ) was derived from the slope of the charging current  $(j_a - j_c)/2$  versus scan rate ( $\nu$ ) plot, and ECSA was calculated as  $C_{dl}/C_s$ , where  $C_s$  is 40  $\mu\text{F cm}^{-2}$ . The TOF values, reflecting the activity of a single catalytic site, were calculated by the equation:  $\text{TOF} = (j \times A) / (4 \times F \times n)$ , where  $j$  represents the current density ( $\text{A cm}^{-2}$ ) at an applied potential. The  $A$  stands for the working area of the electrode. Electrochemical impedance spectroscopy (EIS) was conducted at 0.5 V (vs. SCE) over a frequency range of 300 kHz to 10 mHz, with the resulting spectra fitted using ZSimDemo

software. Stability was assessed through chronopotentiometry at current densities of 10 and 100 mA cm<sup>-2</sup>. Overall water splitting performance was measured by LSV from 0 to 2.5 V at 5 mV/s.

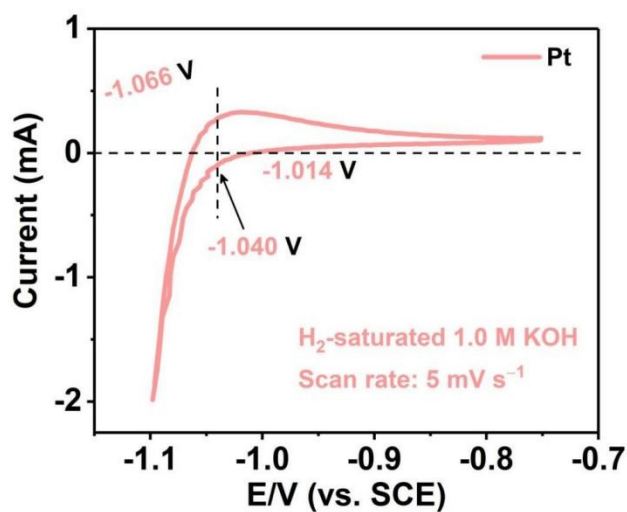

**Fig. S1.** RHE voltage calibration.

The reference hydrogen electrode (RHE) was calibrated in an H<sub>2</sub>-saturated electrolyte with a platinum wire working electrode. By scanning at 5 mV/s, the thermodynamic potential for the hydrogen evolution reaction was determined from the average of the two zero-current potentials. As illustrated, the measured potential difference between  $E_{(SCE)}$  and  $E_{(RHE)}$  in 1.0 M KOH (pH = 13.6) was 1.040 V. This value is consistent with the theoretical difference calculated from the Nernst equation,  $E_{(RHE)} = E_{(SCE)} + 0.241 + 0.059 \times \text{pH}$ , which simplifies to 1.040 V under these conditions.

#### **1.4 Faraday efficiency measurement using rotating ring-disk electrode (RRDE)**

The charge efficiency toward the oxygen evolution reaction (OER) was assessed by a rotating ring-disk electrode (RRDE) method. The experiment employed a Pt-ring/glassy-carbon-disk electrode, with the catalyst (5  $\mu\text{L}$  ink) deposited on the disk. Measurements were carried out in a N<sub>2</sub>-purged 1 M KOH solution at a rotation speed of 1600 rpm. The disk electrode underwent polarization at a sweep rate of 5 mV s<sup>-1</sup> to drive OER, while the ring electrode was

held at 0.4 V vs. RHE to quantitatively reduce the molecular oxygen reaching its surface.

The Faraday efficiency (FE) was then calculated using the following expression<sup>1</sup>:

$$\text{FE} = \frac{I_r/N}{I_d} \quad (1)$$

Where  $I_r$  and  $I_d$  represent the ring and disk currents, respectively, and ( $N = 0.37$ ) is the predetermined collection efficiency of the RRDE. The efficacy of this approach is demonstrated by the observation of a 0.189 mA ring current upon applying a 0.518 mA disk current, confirming the selective detection of oxygen and validating the FE calculation.

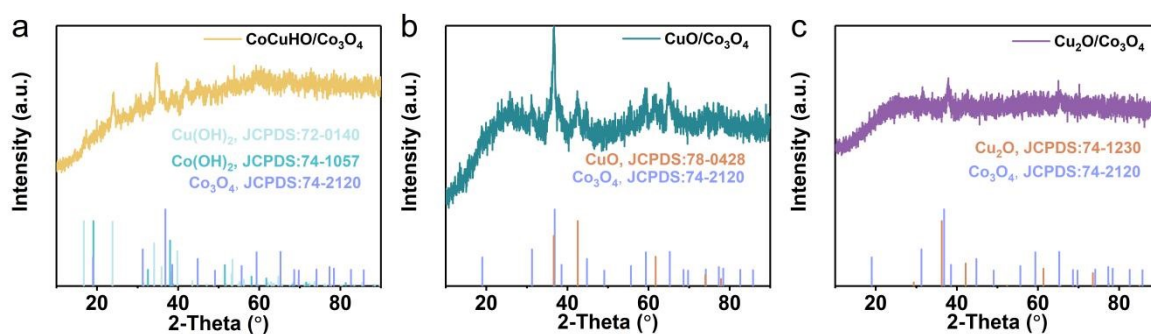

**Fig. S2.** XRD patterns of (a) CoCuHO/Co<sub>3</sub>O<sub>4</sub>@NF, (b) CuO/Co<sub>3</sub>O<sub>4</sub>@NF, (d) Cu<sub>2</sub>O/Co<sub>3</sub>O<sub>4</sub>@NF.

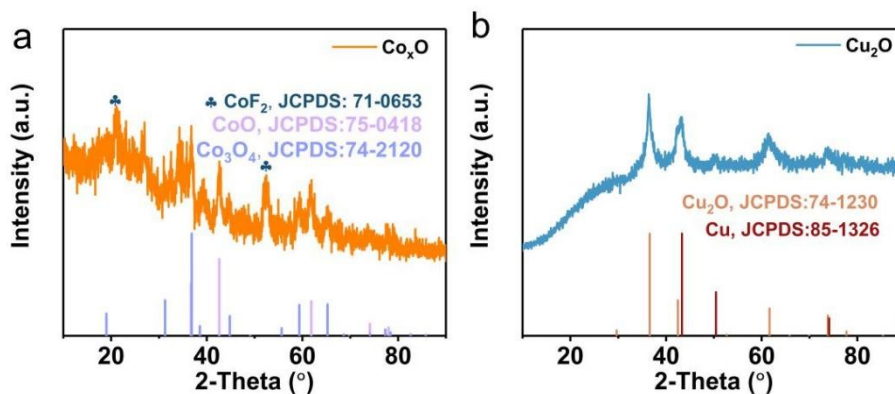

**Fig. S3.** XRD patterns of (a) Co<sub>x</sub>O@NF, (b) Cu<sub>2</sub>O@NF.

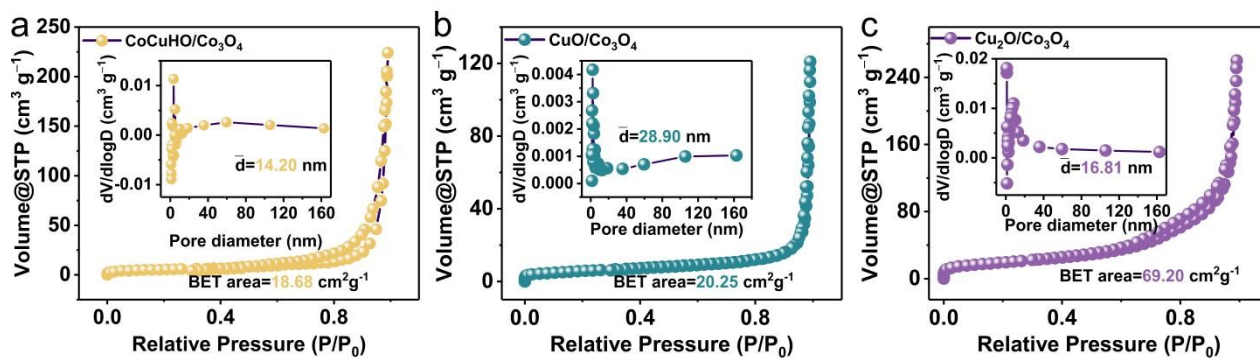

**Fig. S4.**  $N_2$  adsorption/desorption isotherms and pore size distributions of (a)  $CoCuHO/Co_3O_4@NF$ , (b)  $CuO/Co_3O_4@NF$ , (d)  $Cu_2O/Co_3O_4@NF$ .

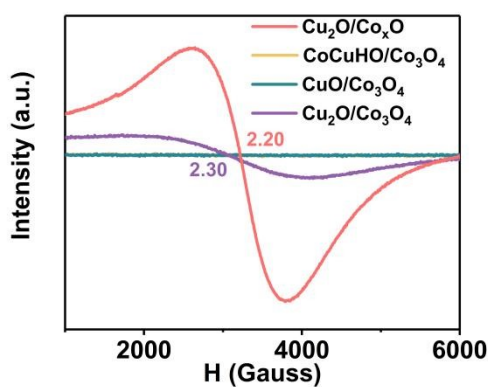

**Fig. S5.** EPR spectra of  $Cu_2O/Co_xO@NF$ ,  $CoCuHO@Co_3O_4/NF$ ,  $CuO@Co_3O_4/NF$ , and  $Cu_2O@Co_3O_4/NF$ .

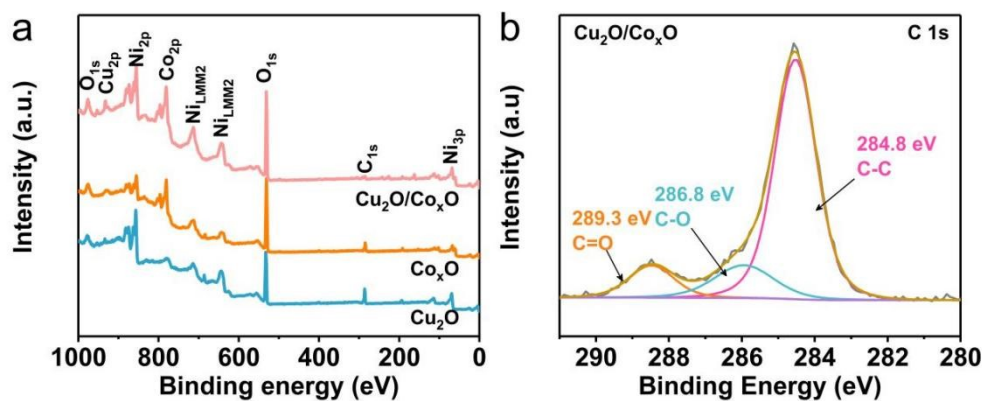

**Fig. S6.** XPS survey spectra (a) and high-resolution C 1s spectrum (b) of  $Cu_2O/Co_xO@NF$ .

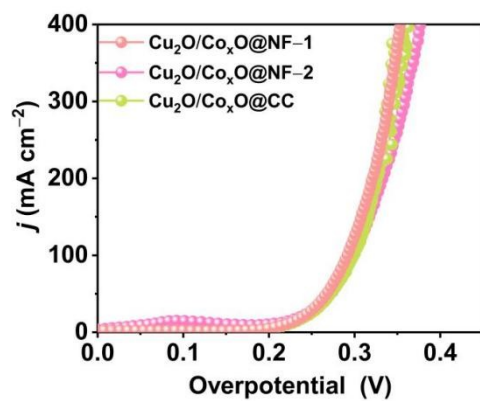

**Fig. S7.** Linear sweep voltammetry (LSV) curves of  $\text{Cu}_2\text{O}/\text{Co}_x\text{O}@NF$  catalysts prepared in different batches on nickel foam (NF) and carbon cloth (CC) substrates.

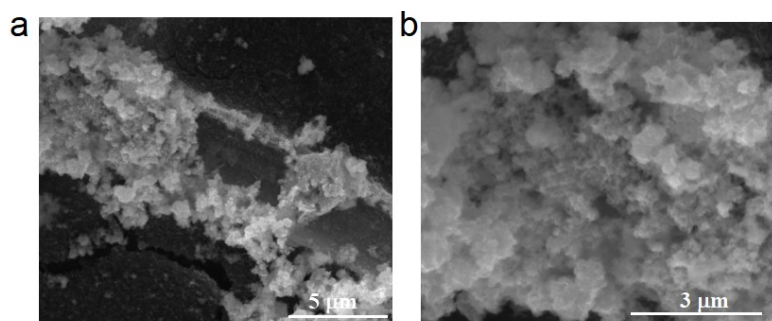

**Fig. S8.** SEM image of  $\text{Cu}_2\text{O}/\text{Co}_x\text{O}@CC$ .

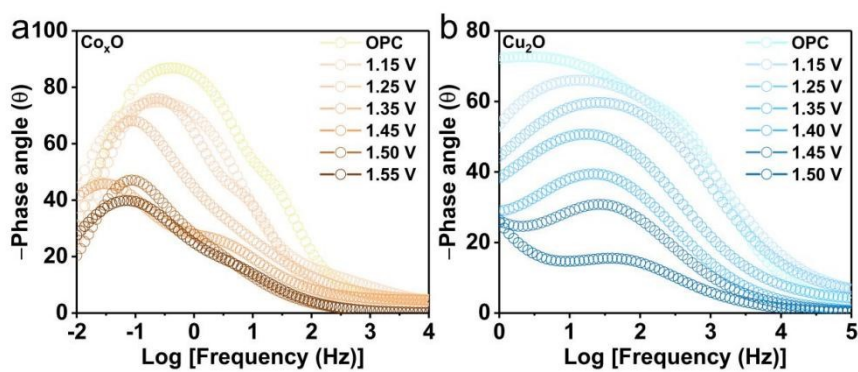

**Fig. S9.** Bode phase plots of (a)  $\text{Co}_x\text{O}@NF$  and (b)  $\text{Cu}_2\text{O}@NF$  at various potentials.

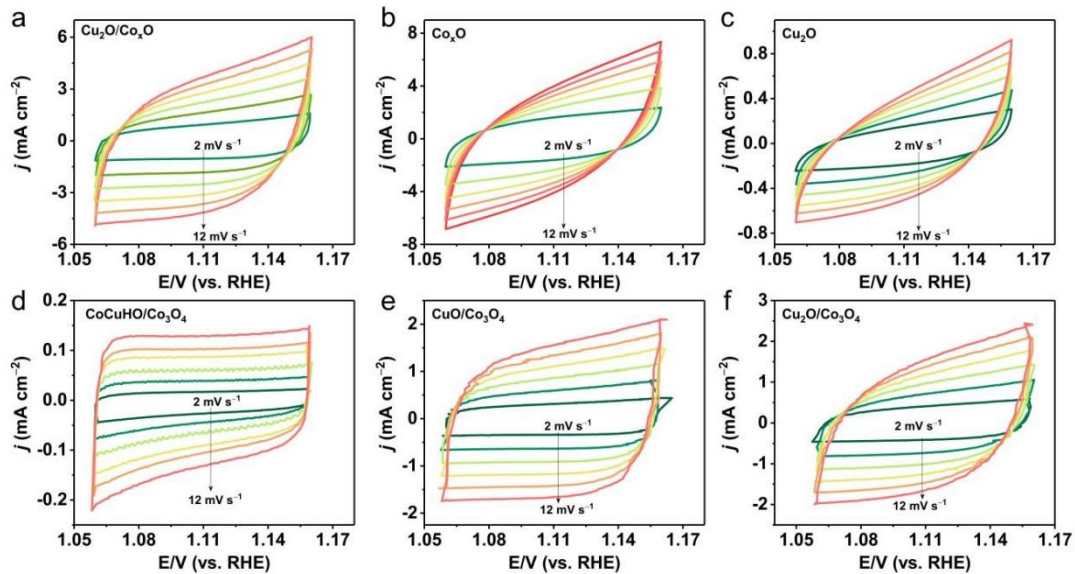

**Fig. S10.** Cyclic voltammograms (CVs) of (a)  $\text{Cu}_2\text{O}/\text{Co}_x\text{O}@NF$ , (b)  $\text{Co}_x\text{O}@NF$ , (c)  $\text{Cu}_2\text{O}@NF$ , (d)  $\text{CoCuHO}/\text{Co}_3\text{O}_4@NF$ , (e)  $\text{CuO}/\text{Co}_3\text{O}_4@NF$  and (f)  $\text{Cu}_2\text{O}/\text{Co}_3\text{O}_4@NF$  at a scan rate of 2, 4, 6, 10 and  $12 \text{ mV s}^{-1}$ .

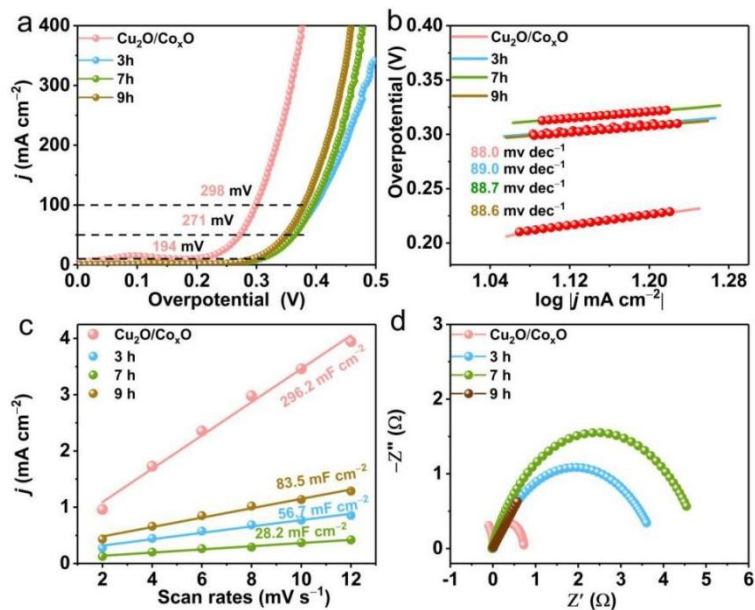

**Fig. S11.** OER performance of  $\text{Cu}_2\text{O}/\text{Co}_x\text{O}@NF$  catalysts synthesized with different phytic acid etching times (3h, 7h, and 9h). (a) Polarization curves at a scan rate of  $0.5 \text{ mV s}^{-1}$ , (b) Tafel slopes, (c) Double-layer capacitance ( $C_{dl}$ ) plots, and (d) Nyquist plots of different catalysts in  $1.0 \text{ M KOH}$  solution.

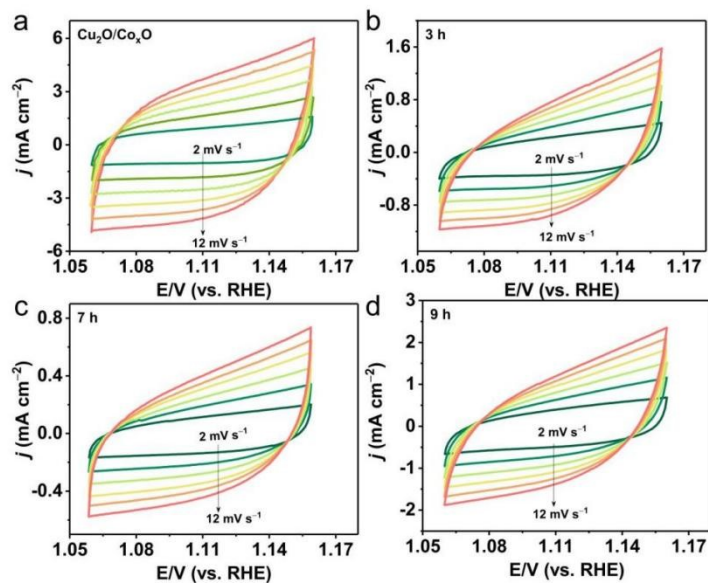

**Fig. S12.** Cyclic voltammograms (CVs) of Cu<sub>2</sub>O/Co<sub>x</sub>O@NF catalysts synthesized with different phytic acid etching times (3h, 7h, and 9h) with scan rates of 2, 4, 6, 10, and 12 mV s<sup>-1</sup> in 1.0 M KOH. (a) 5h, (b) 3h, (c) 7h, and (d) 9h.

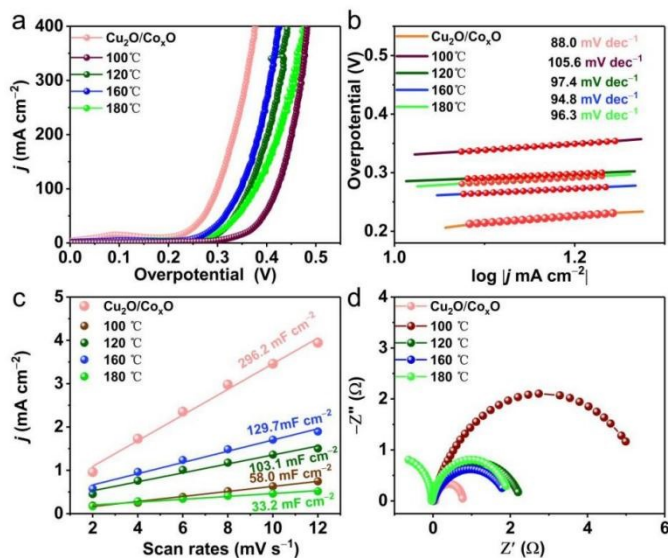

**Fig. S13.** OER performance of Cu<sub>2</sub>O/Co<sub>x</sub>O@NF catalysts synthesized at different hydrothermal reaction temperatures (100°C, 120°C, 160°C, and 180°C). (a) Polarization curves with a scan rate of 0.5 mV s<sup>-1</sup>, (b) Tafel slopes, (c) Double-layer capacitance (C<sub>dl</sub>) plots, and (d) Nyquist plots of different catalysts in 1.0 M KOH solution.

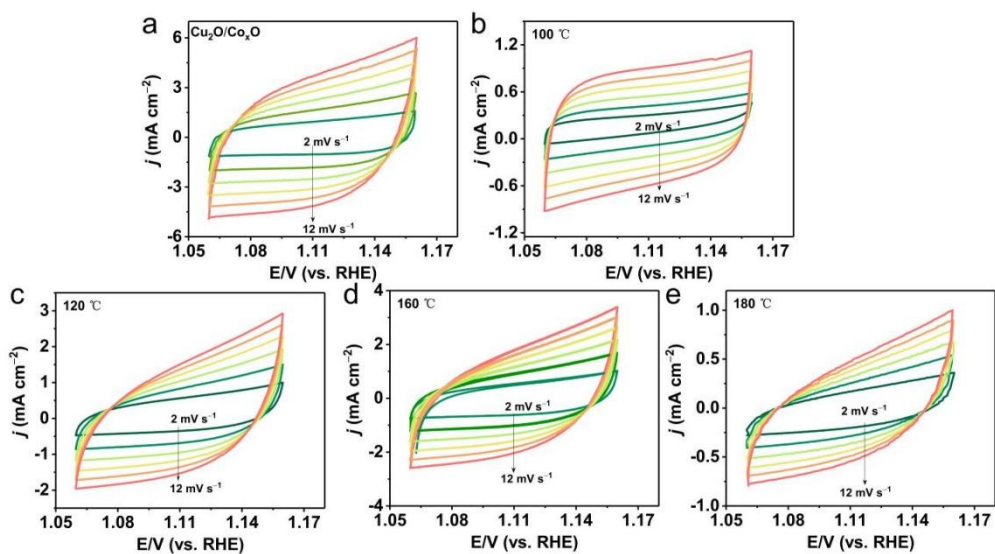

**Fig. S14.** Cyclic voltammograms (CVs) of  $\text{Cu}_2\text{O}/\text{Co}_x\text{O}@NF$  catalysts synthesized at different temperatures measured at scan rates from 2 to  $12 \text{ mV s}^{-1}$  for  $C_{dl}$  determination. (a)  $100^\circ\text{C}$ , (b)  $120^\circ\text{C}$ , (c)  $160^\circ\text{C}$ , and (d)  $180^\circ\text{C}$ .

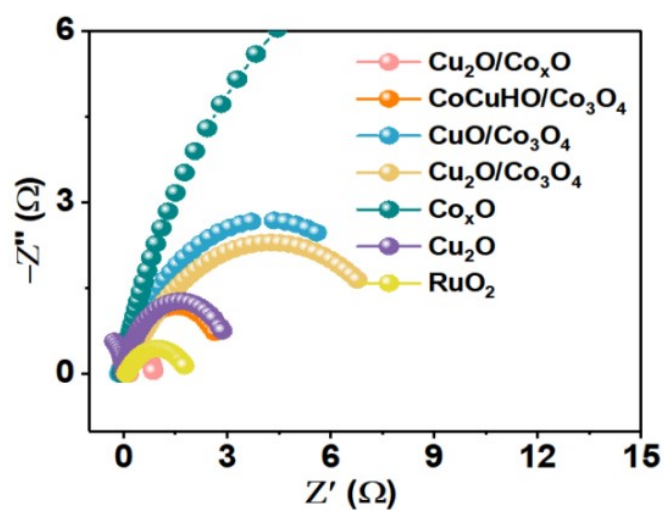

**Fig. S15.** Nyquist plots for different catalysts.

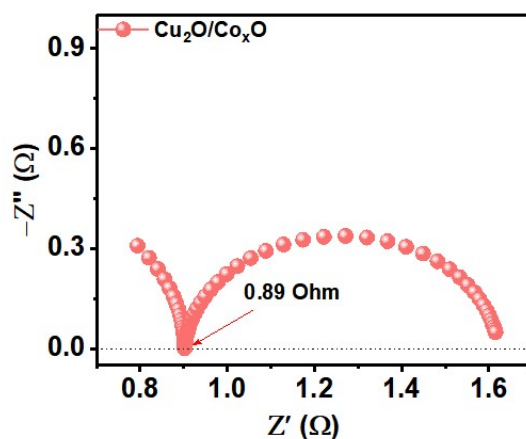

**Fig. S16.** Electrochemical impedance spectrum (Nyquist plot) of  $\text{Cu}_2\text{O}/\text{Co}_x\text{O}@NF$  in 1 M KOH, with high-frequency intercept (inset) defining the solution resistance ( $R_s = 0.89 \Omega$ ).

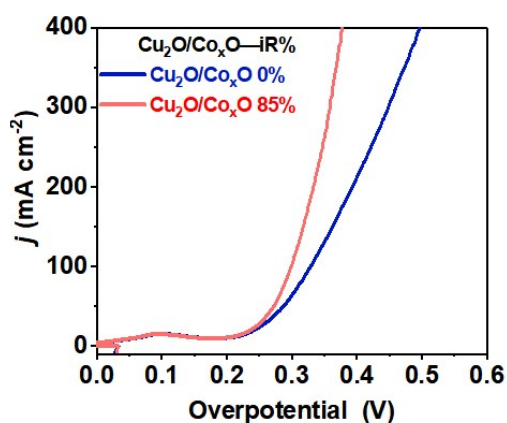

**Fig. S17.** Comparison of raw (uncompensated) and iR-corrected (85%) linear sweep voltammetry curves for OER on  $\text{Cu}_2\text{O}/\text{Co}_x\text{O}@NF$  in 1 M KOH.

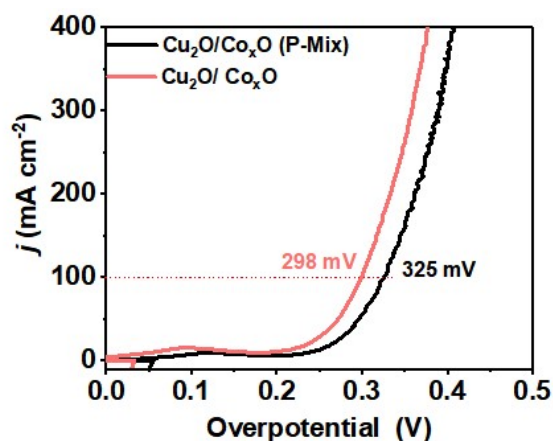

**Fig. S18.** Comparison of OER performance between the  $\text{Cu}_2\text{O}/\text{Co}_x\text{O}@NF$  and the  $\text{Cu}_2\text{O}/\text{Co}_x\text{O}@NF(\text{P-Mix})$ .

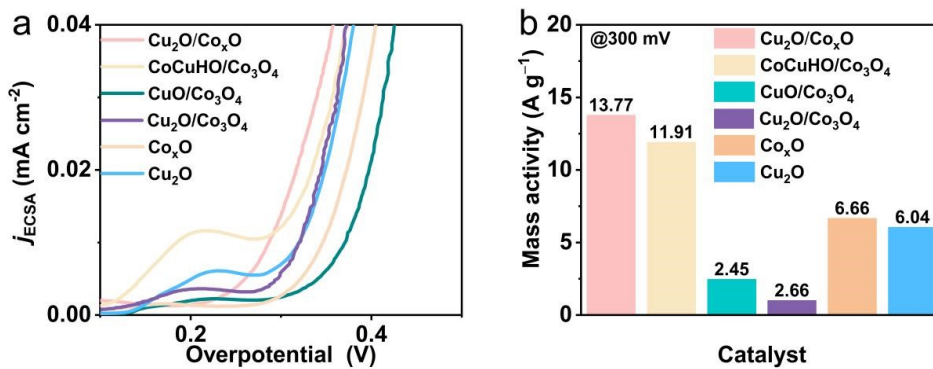

Fig. S19. (a) ECSA-normalized LSV curves. (b) OER mass activity at 300 mV.

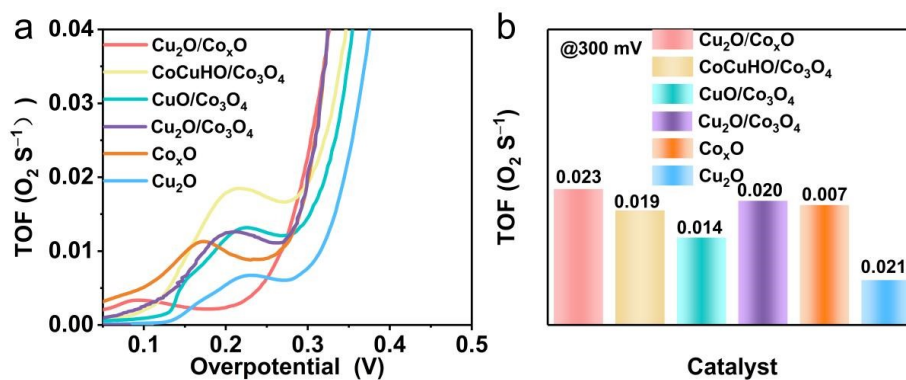

Fig. S20. (a) Turnover frequency values. (b) The TOF values at 350 mV.

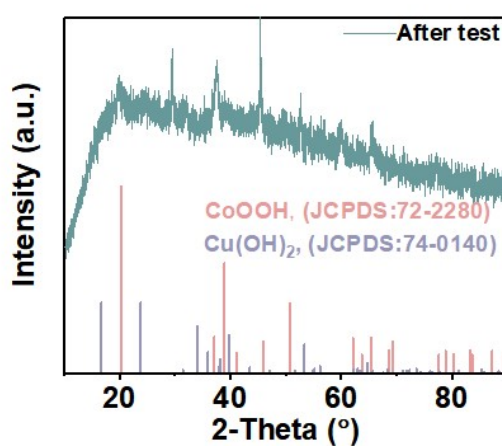

Fig. S21. XRD pattern of the Cu<sub>2</sub>O/Co<sub>x</sub>O@NF catalyst after oxygen evolution reaction stability test.

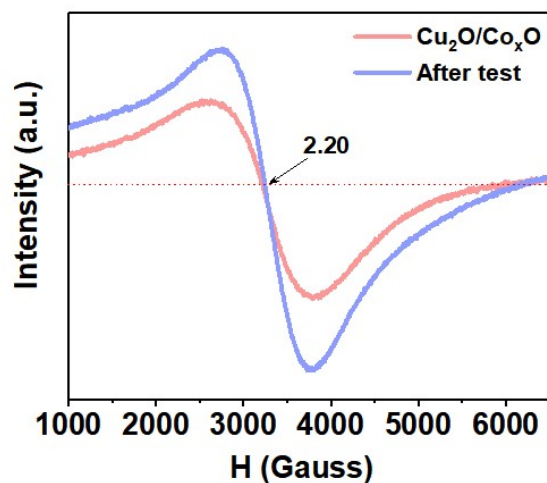

**Fig. S22.** EPR spectra of  $\text{Cu}_2\text{O}/\text{Co}_x\text{O}@NF$  before and after 450 h OER.

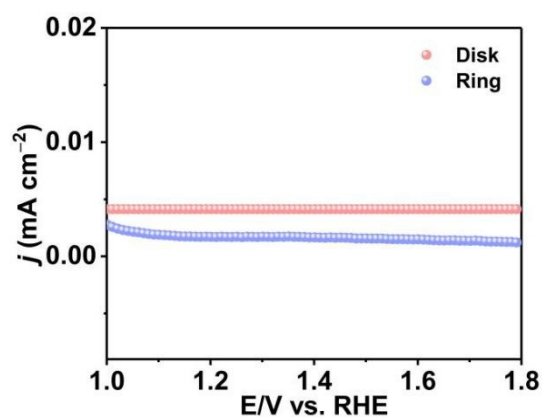

**Fig. S23.** Disk and ring currents of the  $\text{Cu}_2\text{O}/\text{Co}_x\text{O}@NF@NF$  nanoalloy measured in 1.0 M KOH using a rotating ring-disk electrode (RRDE) at 1600 rpm.

**Table S1.** Comparison of design strategies and OER performance of representative cobalt-copper-based electrocatalysts.

| Catalyst                                                          | Design Strategy / Key Feature                                           | Key Distinction from This Work                                                                                           | Reference        |
|-------------------------------------------------------------------|-------------------------------------------------------------------------|--------------------------------------------------------------------------------------------------------------------------|------------------|
| <b>Cu<sub>2</sub>O/Co<sub>x</sub>O</b>                            | <b>Built-in electric field and defect synergy mechanism</b>             | <b>Demonstrates the synergy between directional charge field and atomic-scale defects</b>                                | <b>This work</b> |
| CuO <sub>x</sub> /Co <sub>3</sub> O <sub>4</sub> heterostructures | The mechanism of stabilizing lattice oxygen at heterogeneous interfaces | The interface is used to stabilize specific reaction mechanisms; lacks intentional BIEF-defect coupling                  | 2                |
| CoO/Co <sub>3</sub> O <sub>4</sub> -CuO nanohybrid                | Macroscopic-microstructure engineering                                  | Structural Engineering Optimization for Mass Transfer and Electrical Conductivity;lacks intentional BIEF-defect coupling | 3                |

**Table S2.** Quantitative assessment of metal dissolution for the Cu<sub>2</sub>O/Co<sub>x</sub>O@NF catalyst during at 100 mA/cm<sup>2</sup> for 400 h OER stability test.

| Element           | 100 h Total Dissolution (g) | 200 h Total Dissolution (g) | 300 h Total Dissolution (g) | 400 h Total Dissolution (g) |
|-------------------|-----------------------------|-----------------------------|-----------------------------|-----------------------------|
| Cobalt (Co)       | 6.47092×10 <sup>-5</sup>    | 7.70662×10 <sup>-5</sup>    | 8.43262×10 <sup>-5</sup>    | 9.65262×10 <sup>-5</sup>    |
| Copper (Cu)       | 5.10766×10 <sup>-5</sup>    | 6.88716×10 <sup>-5</sup>    | 7.90516×10 <sup>-5</sup>    | 8.96916×10 <sup>-5</sup>    |
| Total Dissolution | 1.157858×10 <sup>-4</sup>   | 1.459378×10 <sup>-4</sup>   | 1.633778×10 <sup>-4</sup>   | 1.862178×10 <sup>-4</sup>   |
| Dissolution Ratio | 1.48%                       | 1.87%                       | 2.09%                       | 2.38%                       |

**Table S3.** The metal contents in different catalysts were determined by ICP-MS.

| Catalyst                                             | Co (wt%)     | Cu (wt%)     |
|------------------------------------------------------|--------------|--------------|
| <b>Cu<sub>2</sub>O/Co<sub>x</sub>O@NF</b>            | <b>32.17</b> | <b>65.81</b> |
| Co <sub>x</sub> O@NF                                 | 62.29        | None         |
| Cu <sub>2</sub> O@NF                                 | None         | 86.25        |
| CoCuHO/Co <sub>3</sub> O <sub>4</sub> @NF            | 45.12        | 52.42        |
| CuO/Co <sub>3</sub> O <sub>4</sub> @NF               | 46.33        | 51.06        |
| Cu <sub>2</sub> O/Co <sub>3</sub> O <sub>4</sub> @NF | 42.04        | 55.49        |

**Table S4.** Summary of previously reported outstanding transition metal OER catalysts in alkaline solutions.

| Catalyst                                                 | $\eta_{100}$<br>(mV) | Tafel slope<br>(mV dec <sup>-1</sup> ) | Reference        |
|----------------------------------------------------------|----------------------|----------------------------------------|------------------|
| <b>Cu<sub>2</sub>O/Co<sub>x</sub>O@NF</b>                | <b>298</b>           | <b>88</b>                              | <b>This work</b> |
| Co <sub>3</sub> Cu-Ni <sub>2</sub> MNs                   | 390                  | 87                                     | 4                |
| Ru, Ni-CoP                                               | 360                  | 102.3                                  | 5                |
| NW-MnCo <sub>2</sub> O <sub>4</sub> /GD                  | 482                  | 111                                    | 6                |
| CoP/MoP@C,N                                              | 390                  | 97                                     | 7                |
| CoCe-MOF/CP                                              | 455                  | 96.1                                   | 8                |
| Mo-CoMOF@NF                                              | 324                  | 96                                     | 9                |
| Co-Mo-0.005-6N                                           | 357                  | 106                                    | 10               |
| NiCo-LDHs/NiCoS                                          | 308                  | 62                                     | 11               |
| c-CoSe <sub>2</sub> -CoN/NC                              | 490                  | 97                                     | 12               |
| FeCoLDH/NF                                               | 338                  | 83                                     | 13               |
| CoMoS <sub>x</sub> /NF                                   | 345                  | 92                                     | 14               |
| (Fe,Co)OOH/MI                                            | 290                  | 73                                     | 15               |
| Co/Co <sub>3</sub> O <sub>4</sub> /CoF <sub>2</sub> @NSC | 370                  | 88                                     | 16               |
| LQNMP-Co <sub>2</sub> O <sub>3</sub>                     | 320                  | 54                                     | 17               |
| CuO <sub>x</sub> /Co <sub>3</sub> O <sub>4</sub>         | 308                  | 43.5                                   | 2                |

**Table S5.** Overall water splitting performances of different catalysts in 1.0 M KOH electrolyte.

| Cathodic    Anodic catalysts                       | Electrolyte      | Cell voltage (V) | Reference        |
|----------------------------------------------------|------------------|------------------|------------------|
| <b>Cu<sub>2</sub>O/Co<sub>x</sub>O@NF  Pt-C@NF</b> | <b>1.0 M KOH</b> | <b>1.54 V</b>    | <b>This work</b> |
| Co-Ni-P                                            | 1.0 M KOH        | 1.64 V           | 18               |
| CoRu-O/A@HNC-2                                     | 1.0 M KOH        | 1.558 V          | 19               |
| CoFe-P/NF                                          | 1.0 M KOH        | 1.58 V           | 20               |
| Cr-CoP/CP                                          | 1.0 M KOH        | 1.59 V           | 21               |
| Fe <sub>0.14</sub> Co <sub>0.86</sub> -P/CC        | 1.0 M KOH        | 1.63 V           | 22               |
| RuNi <sub>1</sub> Co <sub>1</sub> @CMT             | 1.0 M KOH        | 1.58 V           | 23               |
| NiFeLDH@NiCoP/NF                                   | 1.0 M KOH        | 1.90 V           | 24               |
| Ru-NiO/Co <sub>3</sub> O <sub>4</sub>              | 1.0 M KOH        | 1.555 V          | 25               |
| CoSe <sub>2</sub> /FeSe <sub>2</sub>               | 1.0 M KOH        | 1.60 V           | 26               |
| Mo, Fe-NiCoP/NF                                    | 1.0 M KOH        | 1.545 V          | 27               |
| Cu <sub>3</sub> P/Ni <sub>2</sub> P@CF             | 1.0 M KOH        | 1.56 V           | 28               |

**Table S6.** E-factor comparison of Cu<sub>2</sub>O/Co<sub>x</sub>O and RuO<sub>2</sub> syntheses.

| Catalyst                               | Synthesis Process                                                                 | E-factor (g·g <sup>-1</sup> ) | Waste & Process Features                                                                                                                               |
|----------------------------------------|-----------------------------------------------------------------------------------|-------------------------------|--------------------------------------------------------------------------------------------------------------------------------------------------------|
| <b>Cu<sub>2</sub>O/Co<sub>x</sub>O</b> | Lab-scale one-pot aqueous hydrothermal                                            | 4.34                          | Only H <sub>2</sub> O as waste; no toxic solvents/gases; earth-abundant metal salt raw materials                                                       |
| RuO <sub>2</sub>                       | Lab-scale hydrolysis-calcination (RuCl <sub>3</sub> ·3H <sub>2</sub> O precursor) | 1.36                          | Waste: crystal water, toxic HCl gas, reaction-consumed H <sub>2</sub> O; precious metal precursor                                                      |
| RuO <sub>2</sub>                       | Industrial chlorination-roasting                                                  | 12.60                         | Abundant Cl-containing waste gas/acidic wastewater; alkali residue from tail gas treatment; high energy consumption; precious metal purification waste |

## References

1. S. Zhao, Y. Wang, J. Dong, C.-T. He, H. Yin, P. An, K. Zhao, X. Zhang, C. Gao, L. Zhang, J. Lv, J. Wang, J. Zhang, A. M. Khattak, N. A. Khan, Z. Wei, J. Zhang, S. Liu, H. Zhao and Z. Tang, *Nat. Energy*, 2016, **1**, 16184.
2. C. Jia, Y. Chen, C. Zhou, X. Xiang, X. Long, B. Zhao, N. Zhang, S. Zhao, L. Chai, X. Liu and Z. Lin, *ACS Nano*, 2025, **19**, 19938-19950.
3. H. Liu, Z. Li, J. Hu, Z. Qiu, W. Liu, J. Lu and J. Yin, *Chem. Eng. J.*, 2022, **435**, 134995.
4. P. Dong, Y. Gu, G. Wen, R. Luo, S. Bao, J. Ma and J. Lei, *Small*, 2023, **19**, 2301473.
5. Y. Song, J. Cheng, J. Liu, Q. Ye, X. Gao, J. Lu and Y. Cheng, *Appl. Catal. B: Environ.*, 2021, **298**, 120488.
6. L. Qi, Z. Zheng, C. Xing, Z. Wang, X. Luan, Y. Xue, F. He and Y. Li, *Adv. Funct. Mater.*, 2022, **32**, 2107179.
7. D. Sun, S. Lin, Y. Yu, S. Liu, F. Meng, G. Du and B. Xu, *J. Alloys Compd.*, 2022, **895**, 162595.
8. Y. Liao, Y. Xiao, Z. Li, X. Zhou, J. Liu, F. Guo, J. Li and Y. Li, *Small*, 2024, **20**, 2307685.
9. N. Sun, X. Si, X. Wei, X. Zhou, H. Yu, F. Ding, X. Kong and Y. Sun, *Small*, 2025, **21**, 2407933.
10. X. Zhang, A. Wu, D. Wang, Y. Jiao, H. Yan, C. Jin, Y. Xie and C. Tian, *Appl. Catal. B: Environ.*, 2023, **328**, 122474.
11. J. Li, L. Wang, H. He, Y. Chen, Z. Gao, N. Ma, B. Wang, L. Zheng, R. Li, Y. Wei, J. Xu, Y. Xu, B. Cheng, Z. Yin and D. Ma, *Nano Res.*, 2022, **15**, 4986-4995.
12. X. Xu, X. Wang, S. Huo, X. Liu, X. Ma, M. Liu and J. Zou, *Adv. Mater.*, 2024, **36**, 2306844.
13. T. Tang, Z. Jiang, J. Deng, S. Niu, Z.-C. Yao, W.-J. Jiang, L.-J. Zhang and J.-S. Hu, *Nano Res.*, 2022, **15**, 10021-10028.
14. X. Shan, J. Liu, H. Mu, Y. Xiao, B. Mei, W. Liu, G. Lin, Z. Jiang, L. Wen and L. Jiang, *Angew. Chem. Int. Ed.*, 2020, **59**, 1659-1665.
15. W. Huang, J. Li, X. Liao, R. Lu, C. Ling, X. Liu, J. Meng, L. Qu, M. Lin, X. Hong, X. Zhou, S. Liu, Y. Zhao, L. Zhou and L. Mai, *Adv. Mater.*, 2022, **34**, 2200270.
16. H. Li, G. Yan, H. Zhao, P. C. Howlett, X. Wang and J. Fang, *Adv. Mater.*, 2024, **36**, 2311272.
17. Z. Fan, Q. Sun, H. Yang, W. Zhu, F. Liao, Q. Shao, T. Zhang, H. Huang, T. Cheng, Y. Liu, M. Shao, M. Shao and Z. Kang, *ACS Nano*, 2024, **18**, 5029-5039.
18. L. Chai, S. Liu, S. Pei and C. Wang, *Chem. Eng. J.*, 2021, **420**, 129686.
19. G. Li, K. Zheng, W. Li, Y. He and C. Xu, *ACS Appl. Mater. Interfaces*, 2020, **12**, 51437-51447.
20. D. Duan, D. Guo, J. Gao, S. Liu and Y. Wang, *J. Colloid Interface Sci.*, 2022, **622**, 250-260.
21. W. Li, Y. Jiang, Y. Li, Q. Gao, W. Shen, Y. Jiang, R. He and M. Li, *Chem. Eng. J.*, 2021, **425**, 130651.
22. H. Yu, L. Qi, Y. Hu, Y. Qu, P. Yan, T. T. Isimjan and X. Yang, *J. Colloid Interface Sci.*, 2021, **600**, 811-819.

23. Y. Xue, Q. Yan, X. Bai, Y. Xu, X. Zhang, Y. Li, K. Zhu, K. Ye, J. Yan, D. Cao and G. Wang, *J. Colloid Interface Sci.*, 2022, **612**, 710-721.
24. H. Zhang, X. Li, A. Hähnel, V. Naumann, C. Lin, S. Azimi, S. L. Schweizer, A. W. Maijenburg and R. B. Wehrspohn, *Adv. Funct. Mater.*, 2018, **28**, 1706847.
25. J. Zhang, J. Lian, Q. Jiang and G. Wang, *Chem. Eng. J.*, 2022, **439**, 135634.
26. F. O. Boakye, Y. Li, K. A. Owusu, I. S. Amiin, Y. Cheng and H. Zhang, *Mater. Chem. Phys.*, 2022, **275**, 125201.
27. X. An, L. Quan, J. Liu, Q. Tang, H. Lan and H. Liu, *J. Colloid Interface Sci.*, 2022, **615**, 456-464.
28. H. Liu, J. Gao, X. Xu, Q. Jia, L. Yang, S. Wang and D. Cao, *Chem. Eng. J.*, 2022, **448**, 137706.
